# Supplementary material for: Graphene oxide coupled AgBr nanosheets: an efficient dual-functional visible-light-responsive nanophotocatalyst with enhanced performance
Source: Royal Society of Chemistry journal article supplement (doi:10.1039/c2ta00964a), 2012-12-21
Supplement: c2ta00964a.pdf [file c2ta00964a.pdf]

## Electronic Supplementary Information (ESI)

# Graphene oxide coupled AgBr nanosheets: an efficient dual-functional visible-light-responsive nanophotocatalyst with enhanced performance

Jizhuang Wang,<sup>a</sup> Changhua An,<sup>\*a</sup> Junxue Liu,<sup>a</sup> Guangzhao Xi,<sup>a</sup> Wen Jiang,<sup>a</sup> Shutao Wang,<sup>a</sup> and Qinhui Zhang<sup>b</sup>

<sup>a</sup> State Key Laboratory of Heavy Oil Processing and Key Laboratory of New Energy Physics & Materials Science in Universities of Shandong, College of Science, China University of Petroleum, Qingdao, Shandong 266580, P. R. China. Fax: (+) 86-532-86981787; E-mail: anchh@ustc.edu

<sup>b</sup> State Key Laboratory of Heavy Oil, College of Chemical Engineering, China University of Petroleum, Qingdao, 266580, P. R. China.

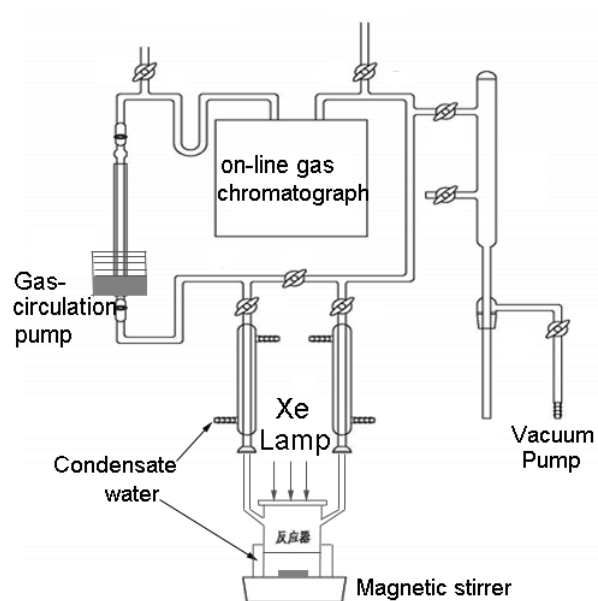

Figure S1. The schematic illustration of the hydrogen evolution system.

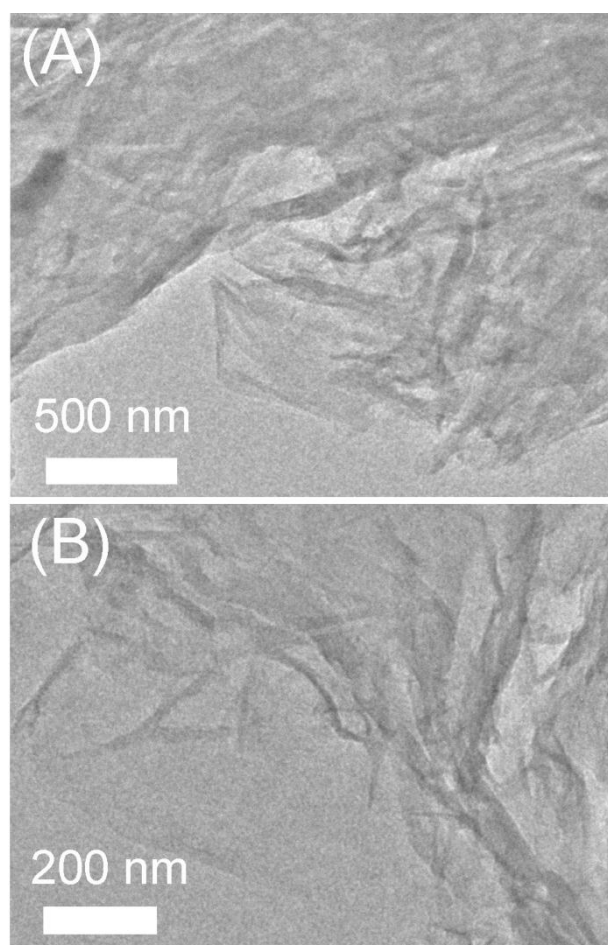

Figure S2. The TEM images of GO sheets.

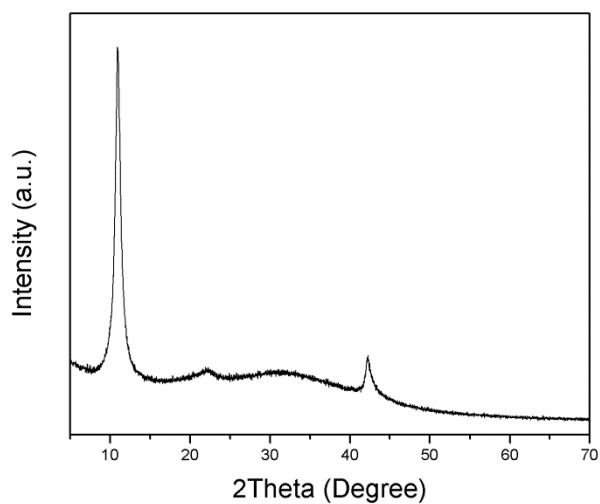

Figure S3. XRD pattern of as-prepared GO sample.

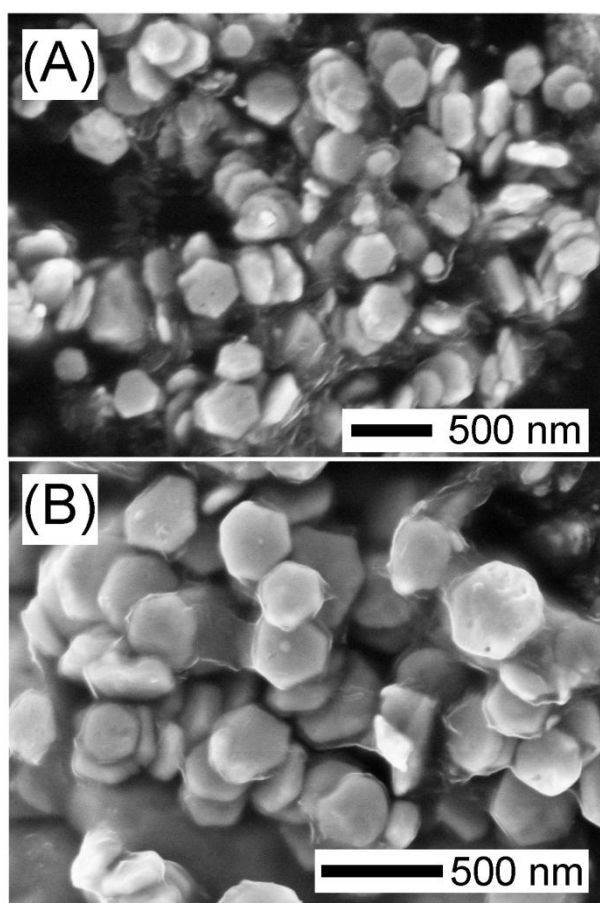

Figure S4. The SEM images of GO@AgBr hybrid nanosheets.

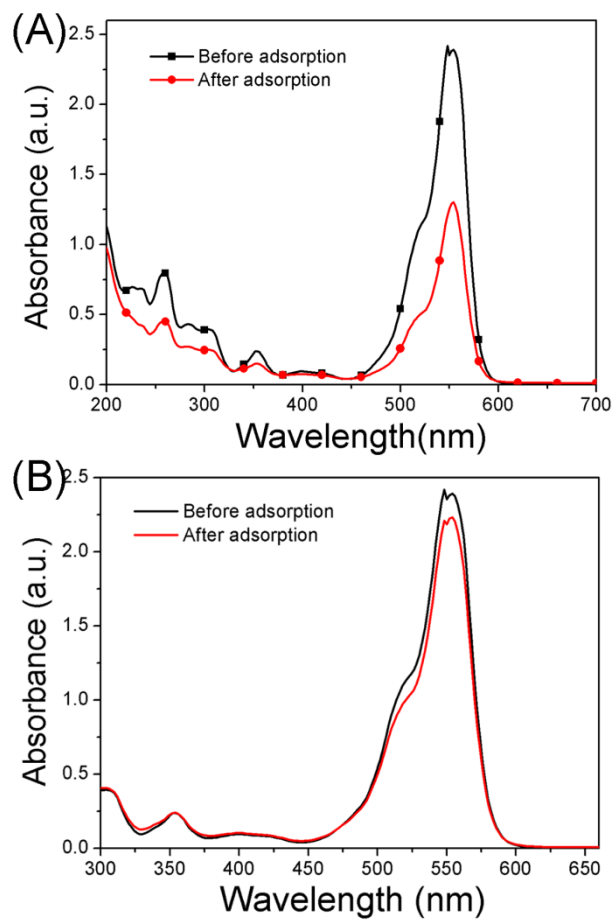

Figure S5. Absorption spectra of RhB solution before and after adsorption on (A) GO@AgBr nanocomposites and (B) bare AgBr nanosheets.

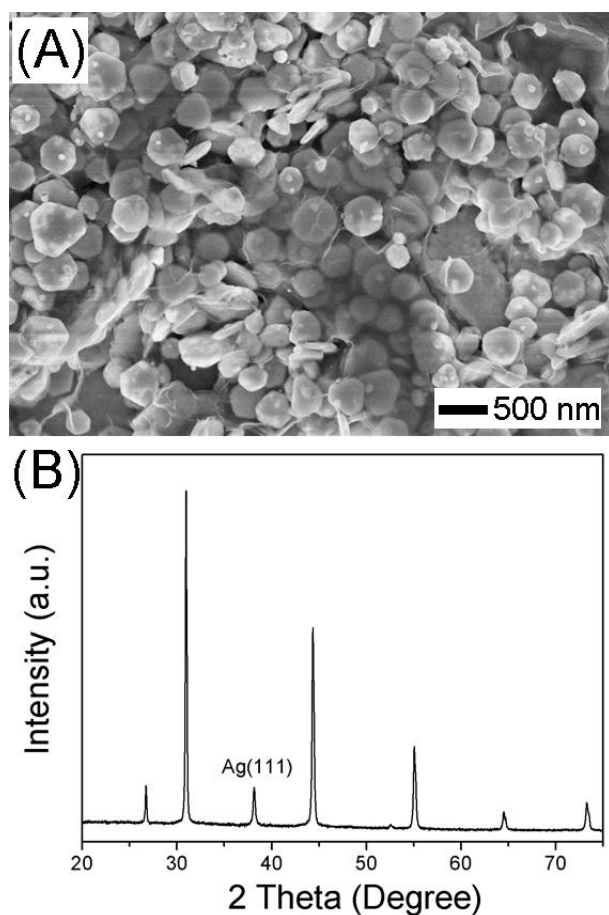

Figure S6. The SEM images (A) and XRD pattern (B) of GO@AgBr after repeated uses for the degradation of RhB solution.

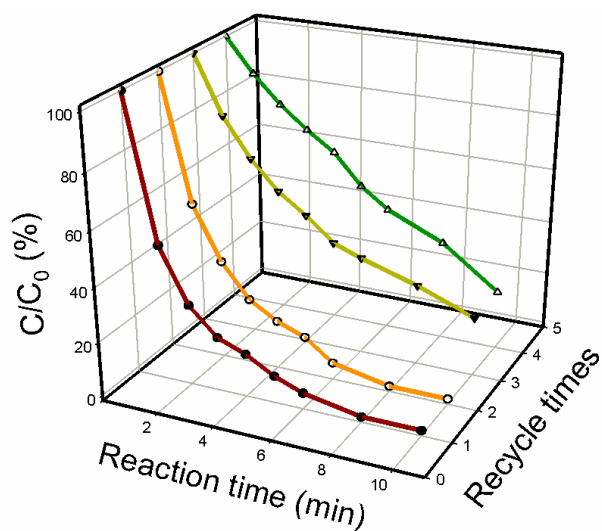

Figure S7. The degradation curves of RhB solution for 4 successive reactions catalyzed with the same batch of AgBr nanosheets under visible-light irradiation.
